# Supplementary material for: White Lupin Drought Tolerance: Genetic Variation, Trait Genetic Architecture, and Genome-Enabled Prediction
Source: MDPI journal article supplement (doi:10.3390/ijms24032351), 2023-01-25
Supplement: s1 [file s1]

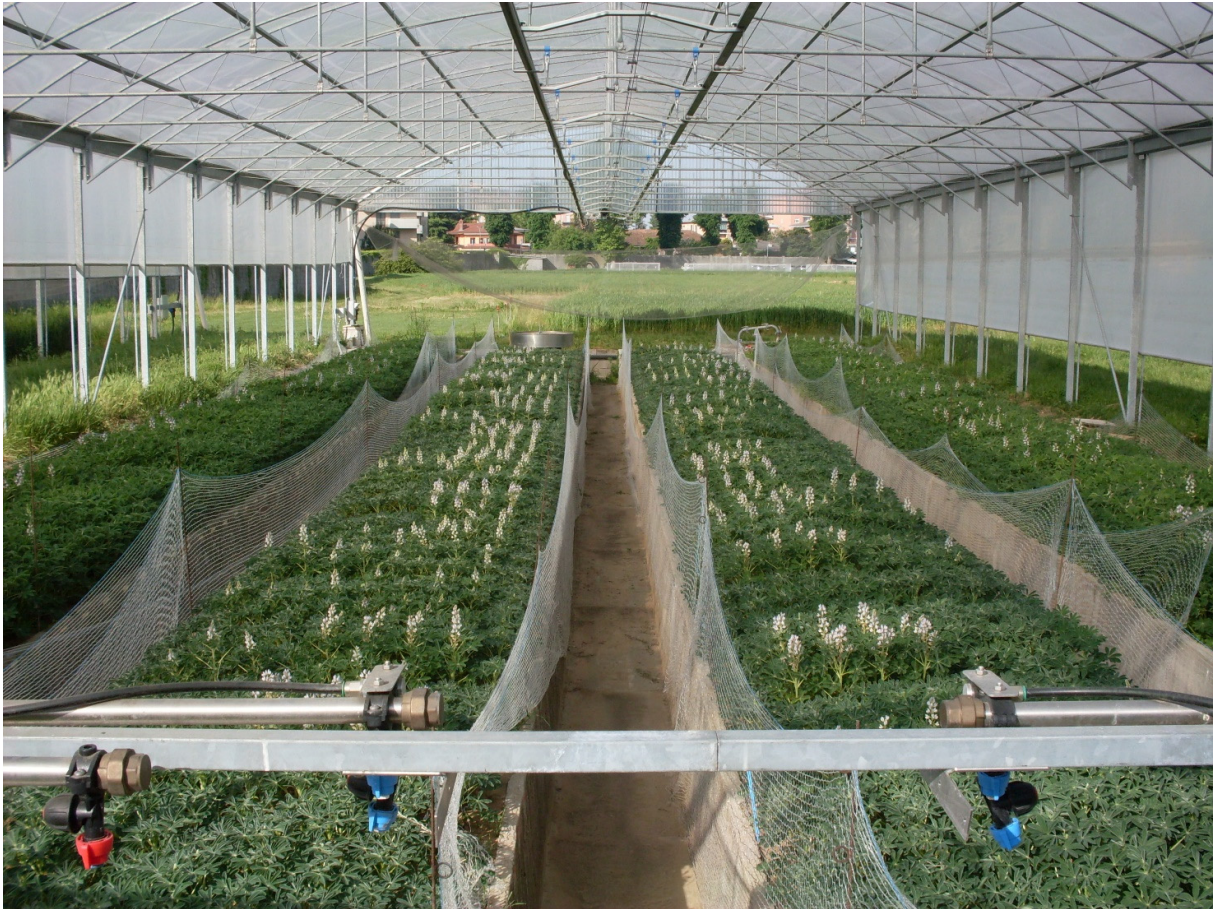

**Supplementary Figure S3.** Portion of the phenotyping platform including four large, bottomless containers, in which moisture-favourable and drought stress water treatments were assigned to outer and inner containers, respectively, from April 16 until June 16.
