# Supplementary material for: White Lupin Drought Tolerance: Genetic Variation, Trait Genetic Architecture, and Genome-Enabled Prediction
Source: MDPI journal article supplement (doi:10.3390/ijms24032351), 2023-01-25
Supplement: s1 [file s1]

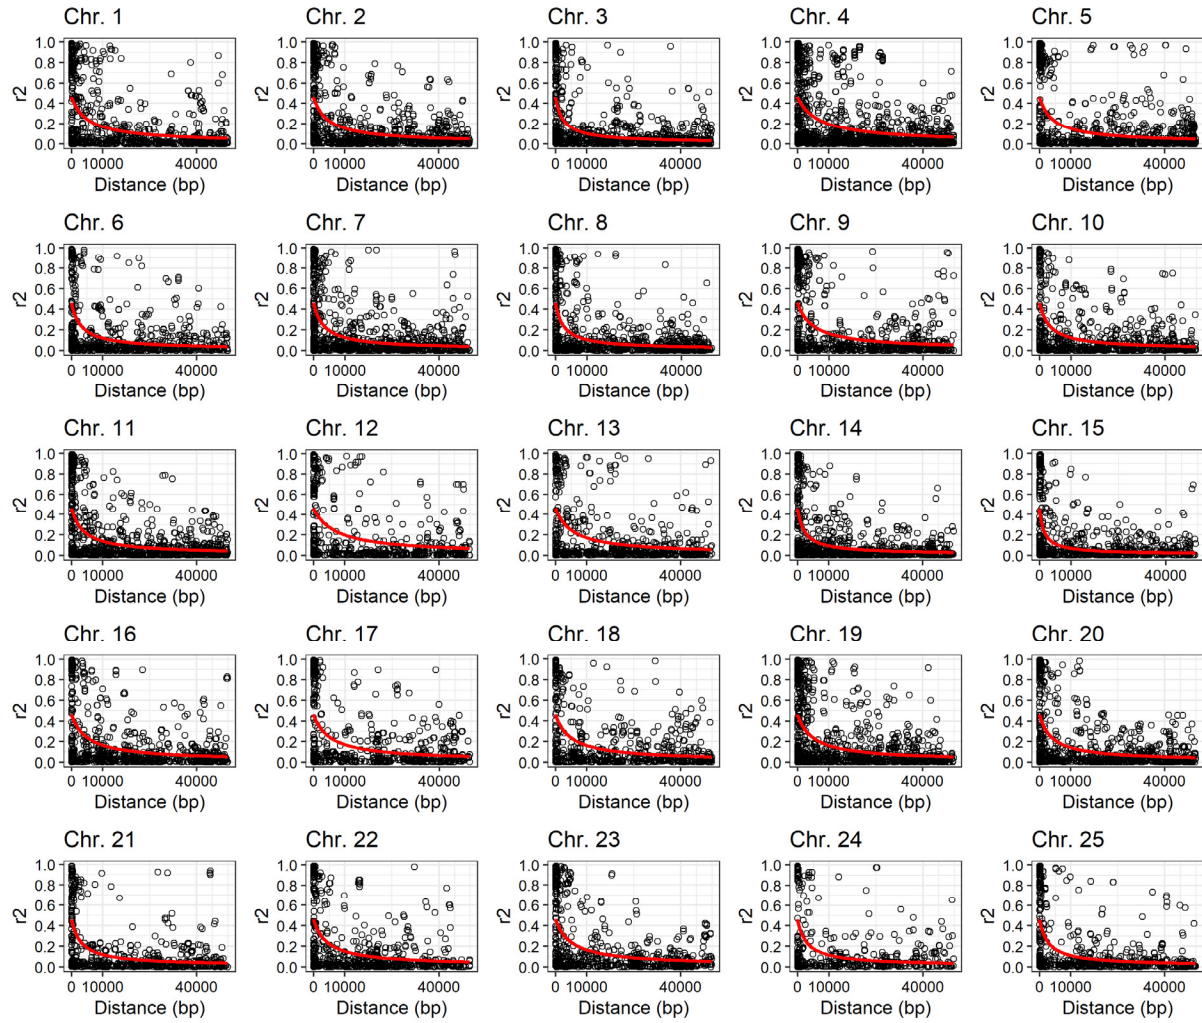

**Supplementary Figure S1.** LD decay plots for white lupin chromosomes based on Pearson's correlation ( $r^2$ ) (Y axis) and physical distance (X axis) estimated on pairwise combinations of 9,828 SNPs within a 50 kb window for 134 recombinant inbred lines.
