# Supplementary material for: White Lupin Drought Tolerance: Genetic Variation, Trait Genetic Architecture, and Genome-Enabled Prediction
Source: MDPI journal article supplement (doi:10.3390/ijms24032351), 2023-01-25
Supplement: s1 [file s1]

**Supplementary Table S2.** List of 138 white lupin test inbred lines and their parent germplasm

| Line | Cross | Female parent | Male parent |  | Line  | Cross | Female parent | Male parent |
|------|-------|---------------|-------------|--|-------|-------|---------------|-------------|
| 1.09 | 1     | Lucky         | Gr56        |  | 9.09  | 9     | Lucky         | La246       |
| 1.22 | 1     | Lucky         | Gr56        |  | 9.16  | 9     | Lucky         | La246       |
| 1.31 | 1     | Lucky         | Gr56        |  | 9.42  | 9     | Lucky         | La246       |
| 1.44 | 1     | Lucky         | Gr56        |  | 9.54  | 9     | Lucky         | La246       |
| 1.51 | 1     | Lucky         | Gr56        |  | 9.58  | 9     | Lucky         | La246       |
| 1.62 | 1     | Lucky         | Gr56        |  | 9.60  | 9     | Lucky         | La246       |
| 1.71 | 1     | Lucky         | Gr56        |  | 9.78  | 9     | Lucky         | La246       |
| 1.74 | 1     | Lucky         | Gr56        |  | 9.81  | 9     | Lucky         | La246       |
| 1.87 | 1     | Lucky         | Gr56        |  | 9.86  | 9     | Lucky         | La246       |
| 2.56 | 2     | MB-38         | Gr56        |  | 10.03 | 10    | MB-38         | La246       |
| 2.70 | 2     | MB-38         | Gr56        |  | 10.18 | 10    | MB-38         | La246       |
| 2.91 | 2     | MB-38         | Gr56        |  | 10.21 | 10    | MB-38         | La246       |
| 3.03 | 3     | Arsenio       | Gr56        |  | 10.39 | 10    | MB-38         | La246       |
| 3.07 | 3     | Arsenio       | Gr56        |  | 10.40 | 10    | MB-38         | La246       |
| 3.09 | 3     | Arsenio       | Gr56        |  | 10.44 | 10    | MB-38         | La246       |
| 3.17 | 3     | Arsenio       | Gr56        |  | 10.47 | 10    | MB-38         | La246       |
| 3.35 | 3     | Arsenio       | Gr56        |  | 10.59 | 10    | MB-38         | La246       |
| 3.38 | 3     | Arsenio       | Gr56        |  | 10.62 | 10    | MB-38         | La246       |
| 3.39 | 3     | Arsenio       | Gr56        |  | 10.91 | 10    | MB-38         | La246       |
| 3.42 | 3     | Arsenio       | Gr56        |  | 11.01 | 11    | Arsenio       | La246       |
| 3.75 | 3     | Arsenio       | Gr56        |  | 11.02 | 11    | Arsenio       | La246       |
| 4.05 | 4     | L27PS3        | Gr56        |  | 11.09 | 11    | Arsenio       | La246       |
| 4.07 | 4     | L27PS3        | Gr56        |  | 11.10 | 11    | Arsenio       | La246       |
| 4.12 | 4     | L27PS3        | Gr56        |  | 11.22 | 11    | Arsenio       | La246       |
| 4.23 | 4     | L27PS3        | Gr56        |  | 11.23 | 11    | Arsenio       | La246       |
| 4.25 | 4     | L27PS3        | Gr56        |  | 11.25 | 11    | Arsenio       | La246       |
| 4.53 | 4     | L27PS3        | Gr56        |  | 11.37 | 11    | Arsenio       | La246       |
| 4.56 | 4     | L27PS3        | Gr56        |  | 11.40 | 11    | Arsenio       | La246       |
| 4.66 | 4     | L27PS3        | Gr56        |  | 12.09 | 12    | L27PS3        | La246       |
| 4.67 | 4     | L27PS3        | Gr56        |  | 12.12 | 12    | L27PS3        | La246       |
| 5.06 | 5     | Lucky         | La646       |  | 12.15 | 12    | L27PS3        | La246       |
| 5.12 | 5     | Lucky         | La646       |  | 12.25 | 12    | L27PS3        | La246       |
| 5.23 | 5     | Lucky         | La646       |  | 12.34 | 12    | L27PS3        | La246       |
| 5.28 | 5     | Lucky         | La646       |  | 12.36 | 12    | L27PS3        | La246       |
| 5.34 | 5     | Lucky         | La646       |  | 12.37 | 12    | L27PS3        | La246       |
| 5.40 | 5     | Lucky         | La646       |  | 12.44 | 12    | L27PS3        | La246       |
| 5.43 | 5     | Lucky         | La646       |  | 12.50 | 12    | L27PS3        | La246       |
| 5.50 | 5     | Lucky         | La646       |  | 13.08 | 13    | Lucky         | LAP123      |
| 5.51 | 5     | Lucky         | La646       |  | 13.19 | 13    | Lucky         | LAP123      |

|      |   |         |       |  |       |    |         |        |
|------|---|---------|-------|--|-------|----|---------|--------|
| 6.01 | 6 | MB-38   | La646 |  | 13.24 | 13 | Lucky   | LAP123 |
| 6.30 | 6 | MB-38   | La646 |  | 13.27 | 13 | Lucky   | LAP123 |
| 6.41 | 6 | MB-38   | La646 |  | 13.31 | 13 | Lucky   | LAP123 |
| 6.43 | 6 | MB-38   | La646 |  | 13.32 | 13 | Lucky   | LAP123 |
| 6.45 | 6 | MB-38   | La646 |  | 13.37 | 13 | Lucky   | LAP123 |
| 6.47 | 6 | MB-38   | La646 |  | 13.45 | 13 | Lucky   | LAP123 |
| 6.58 | 6 | MB-38   | La646 |  | 13.50 | 13 | Lucky   | LAP123 |
| 6.62 | 6 | MB-38   | La646 |  | 13.62 | 13 | Lucky   | LAP123 |
| 6.65 | 6 | MB-38   | La646 |  | 14.01 | 14 | MB-38   | LAP123 |
| 6.71 | 6 | MB-38   | La646 |  | 14.02 | 14 | MB-38   | LAP123 |
| 7.10 | 7 | Arsenio | La646 |  | 14.03 | 14 | MB-38   | LAP123 |
| 7.25 | 7 | Arsenio | La646 |  | 14.04 | 14 | MB-38   | LAP123 |
| 7.26 | 7 | Arsenio | La646 |  | 15.04 | 15 | Arsenio | LAP123 |
| 7.31 | 7 | Arsenio | La646 |  | 15.05 | 15 | Arsenio | LAP123 |
| 7.46 | 7 | Arsenio | La646 |  | 15.10 | 15 | Arsenio | LAP123 |
| 7.47 | 7 | Arsenio | La646 |  | 15.17 | 15 | Arsenio | LAP123 |
| 7.54 | 7 | Arsenio | La646 |  | 15.29 | 15 | Arsenio | LAP123 |
| 7.56 | 7 | Arsenio | La646 |  | 15.32 | 15 | Arsenio | LAP123 |
| 7.72 | 7 | Arsenio | La646 |  | 15.33 | 15 | Arsenio | LAP123 |
| 8.02 | 8 | L27PS3  | La646 |  | 15.36 | 15 | Arsenio | LAP123 |
| 8.08 | 8 | L27PS3  | La646 |  | 15.62 | 15 | Arsenio | LAP123 |
| 8.14 | 8 | L27PS3  | La646 |  | 15.91 | 15 | Arsenio | LAP123 |
| 8.18 | 8 | L27PS3  | La646 |  | 16.10 | 16 | L27PS3  | LAP123 |
| 8.34 | 8 | L27PS3  | La646 |  | 16.20 | 16 | L27PS3  | LAP123 |
| 8.37 | 8 | L27PS3  | La646 |  | 16.22 | 16 | L27PS3  | LAP123 |
| 8.49 | 8 | L27PS3  | La646 |  | 16.29 | 16 | L27PS3  | LAP123 |
| 8.51 | 8 | L27PS3  | La646 |  | 16.35 | 16 | L27PS3  | LAP123 |
| 8.55 | 8 | L27PS3  | La646 |  | 16.37 | 16 | L27PS3  | LAP123 |
|      |   |         |       |  | 16.39 | 16 | L27PS3  | LAP123 |
|      |   |         |       |  | 16.52 | 16 | L27PS3  | LAP123 |
|      |   |         |       |  | 16.77 | 16 | L27PS3  | LAP123 |
|      |   |         |       |  | 16.88 | 16 | L27PS3  | LAP123 |
