# Supplementary material for: White Lupin Drought Tolerance: Genetic Variation, Trait Genetic Architecture, and Genome-Enabled Prediction
Source: MDPI journal article supplement (doi:10.3390/ijms24032351), 2023-01-25
Supplement: s1 [file s1]

**Supplementary Table S1.** List of genes potentially associated to the significant SNPs detected by a GWAS based on 9,828 SNPs and 134 white lupin inbred lines for grain yield under moisture favorable (Yield\_NS) and drought conditions (Yield\_S), and onset of flowering (Flowering), identified by scanning a region as long as the mean chromosome distance at which LD dropped to 0.2 in both directions from each significant SNP and reported with the relative annotated function (<https://www.whitelupin.fr/>).

| SNP            | Scanned Interval        | Trait     | Gene              | Function                                                                               |
|----------------|-------------------------|-----------|-------------------|----------------------------------------------------------------------------------------|
| Chr01_6340005  | Chr01_6332535:6347475   | Flowering | Lalb_Ch01g0009841 | Putative inositol-polyphosphate 5-phosphatase                                          |
| Chr01_6340005  | Chr01_6332535:6347475   | Flowering | Lalb_Ch01g0009851 | Putative small GTPase superfamily, P-loop containing nucleoside triphosphate hydrolase |
| Chr03_5647810  | Chr03_5644341:5651279   | Flowering | Lalb_Ch03g0034071 | Putative multi antimicrobial extrusion protein                                         |
| Chr08_862028   | Chr08_858391:865665     | Yield_S   | Lalb_Ch08g0231661 | Putative clathrin, heavy chain                                                         |
| Chr09_6606393  | Chr09_6599110:6613676   | Flowering | Lalb_Ch09g0330521 | Putative peroxin-3                                                                     |
| Chr09_6606393  | Chr09_6599110:6613676   | Flowering | Lalb_Ch09g0330531 | Putative pre-mRNA-splicing factor SPF27                                                |
| Chr13_10513725 | Chr13_10506098:10521352 | Yield_NS  | Lalb_Ch13g0295531 | Putative transcription factor Hap2/NF-YA family                                        |
| Chr13_10513725 | Chr13_10506098:10521352 | Yield_NS  | Lalb_Ch13g0295541 | Putative small monomeric GTPase                                                        |
| Chr13_10513725 | Chr13_10506098:10521352 | Yield_NS  | Lalb_Ch13g0295551 | Putative YTH domain-containing protein                                                 |
| Chr13_1653492  | Chr13_1645865:1661119   | Flowering | Lalb_Ch13g0291541 | Putative transcription factor C2H2 family                                              |

|                |                         |                    |                   |                                                                           |
|----------------|-------------------------|--------------------|-------------------|---------------------------------------------------------------------------|
| Chr13_1653492  | Chr13_1645865:1661119   | Flowering          | Lalb_Ch13g0291551 | Putative small-subunit processome, Utp11 protein                          |
| Chr15_14142372 | Chr15_14140358:14144386 | Flowering          | Lalb_Ch15g0082751 | Putative oxidoreductase                                                   |
| Chr18_13052982 | Chr18_13046123:13059841 | Yield_S; Flowering | Lalb_Ch18g0052061 | hypothetical protein                                                      |
| Chr18_13052982 | Chr18_13046123:13059841 | Yield_S; Flowering | Lalb_Ch18g0052071 | hypothetical protein                                                      |
| Chr20_17362727 | Chr20_17357046:17368408 | Flowering          | Lalb_Ch20g0122361 | Putative cadmium-transporting ATPase                                      |
| Chr20_17362727 | Chr20_17357046:17368408 | Flowering          | Lalb_Ch20g0122371 | Putative transcription factor interactor and regulator C3H-WRC/GRF family |
| Chr21_5357552  | Chr21_5353306:5361798   | Yield_NS           | Lalb_Ch21g0313091 | hypothetical protein                                                      |
| Chr21_5357552  | Chr21_5353306:5361798   | Yield_NS           | Lalb_Ch21g0313101 | Putative mitogen-activated protein MAP kinase phosphatase                 |

---
