# Supplementary material for: White Lupin Drought Tolerance: Genetic Variation, Trait Genetic Architecture, and Genome-Enabled Prediction
Source: MDPI journal article supplement (doi:10.3390/ijms24032351), 2023-01-25
Supplement: s1 [file s1]

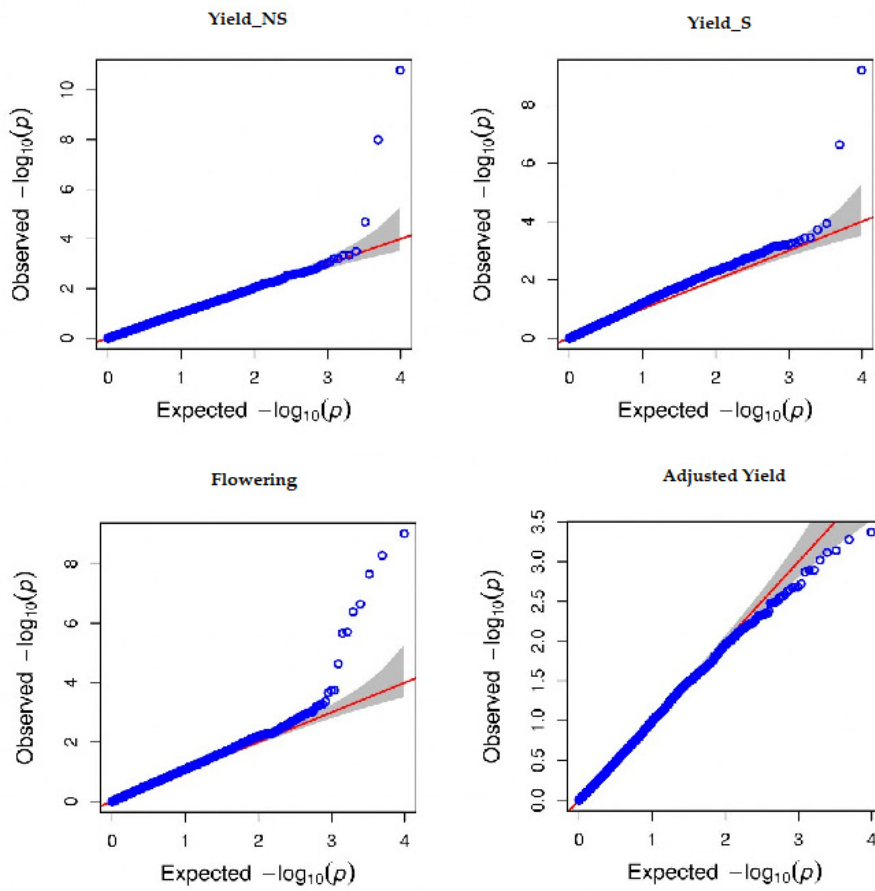

**Supplementary Figure S4.** Quantile-quantile plots comparing the observed trait-marker association scores with those expected in case of no significant association, for a GWAS based on 9,828 SNPs and 134 white lupin recombinant inbred lines performed for grain yield under moisture-favorable (Yield\_NS) and drought conditions (Yield\_S), onset of flowering (Flowering), and adjusted grain yield as yield deviation from the expected value according to the linear regression of yield as a function of onset of flowering.
